# Supplementary material
Source: PubMed Central journal article supplement (PMC1626615)
Supplement: plntcell_tpc.106.045013_1.pdf [file plntcell_tpc.106.045013_1.pdf]

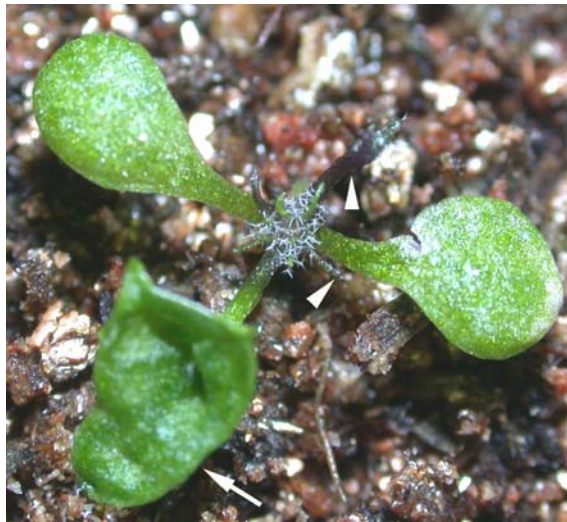

**Supplemental Figure 1.** A seedling of the *rpt5a as2-101* double mutant. An arrow indicates a lotus-leaf and two arrowheads point to needle-like leaves.
