# Supplementary material
Source: PubMed Central journal article supplement (PMC1626615)
Supplement: plntcell_tpc.106.045013_2.pdf [file plntcell_tpc.106.045013_2.pdf]

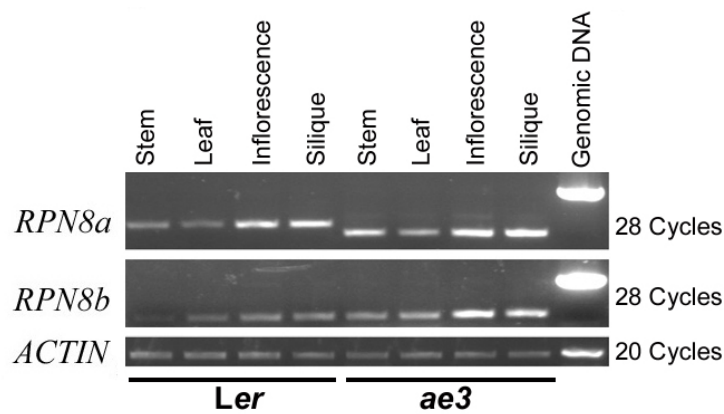

**Supplemental Figure 2.** Expression patterns of *AE3/RPN8a* and *RPN8b*. RT-PCR analyses revealed that these two genes were both expressed in stems, leaves, flowers and fruits. Note that *RPN8b* transcript levels were enhanced in the *ae3/rpn8a* mutant background, and this expression pattern was consistent with those from other two separate experiments, using different preparations of RNA samples. Leaves of 4-week-old seedlings were used for RNA preparations.
