# Supplementary material
Source: PubMed Central journal article supplement (PMC1626615)
Supplement: plntcell_tpc.106.045013_3.pdf [file plntcell_tpc.106.045013_3.pdf]

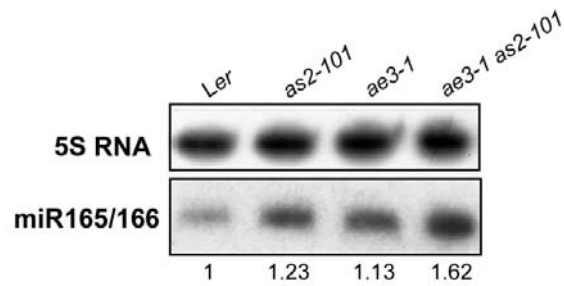

**Supplemental Figure 3.** miR165/166 contents in leaves of *Ler*, *as2-101*, *ae3-1* and *ae3-1 as2-101*. RNA blots were first probed by miRNAs, and the same filter was then analyzed by a 5S RNA probe. Results were consistent in two separate experiments, using different preparations of RNA samples. Hybridization intensity was measured by software Photoshop and the numbers indicate the relative abundance of miR165/166 levels, calculated by using the band intensity of the first lane (*Ler*) as 1. Leaves of 4-week-old seedlings were used for RNA preparations.
