# Supplementary material
Source: PubMed Central journal article supplement (PMC1626615)
Supplement: plntcell_tpc.106.045013_4.pdf [file plntcell_tpc.106.045013_4.pdf]

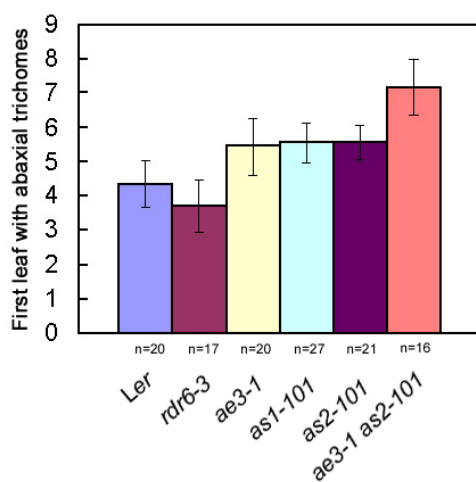

**Supplemental Figure 4.** Analyses of vegetative phase length of wild-type and mutants. n, plant numbers analyzed. Bars indicate standard error.
